# Supplementary material for: REGEN: Ancestral Genome Reconstruction for Bacteria
Source: Genes (Basel). 2012 Jul 18;3(3):423–43. doi: 10.3390/genes3030423 (PMC3899994; doi:10.3390/genes3030423)

# Supplemental material

Kuan Yang, Lenwood S. Heath, João C. Setubal

March 29, 2012

## 1 supplementary tables

Table 1: Integer ID for all Rhizobiales species

| Species Name                                     | Integer ID |
|--------------------------------------------------|------------|
| Agrobacterium_tumefaciens_C58_Cereon             | 1          |
| Agrobacterium_radiobacter_K84                    | 2          |
| Agrobacterium_vitis_S4                           | 3          |
| Azorhizobium_caulinodans_ORS_571                 | 4          |
| Azospirillum_B510_uid32551                       | 5          |
| Bartonella_henselae_Houston-1                    | 6          |
| Beijerinckia_indica_ATCC_9039                    | 7          |
| Bradyrhizobium_japonicum                         | 8          |
| Brucella_suis_1330                               | 9          |
| Mesorhizobium_BNC1                               | 10         |
| Hyphomicrobium_denitrificans_ATCC_51888_uid33261 | 11         |
| Methylobacterium_chloromethanicum_CM4            | 12         |
| Methylocella_silvestris_BL2                      | 13         |
| Nitrobacter_hamburgensis_X14                     | 14         |
| Ochrobactrum_anthropi_ATCC_49188                 | 15         |
| Oligotropha_carboxidovorans_OM5                  | 16         |
| Parvibaculum_lavamentivorans_DS-1                | 17         |
| Rhizobium_etli_CFN_42                            | 18         |
| Rhodomicrobium_vannielii_ATCC_17100_uid38253     | 19         |
| Rhodopseudomonas_palustris_BisA53                | 20         |

|                                   |    |
|-----------------------------------|----|
| Sinorhizobium_meliloti            | 21 |
| Starkeya_novella_DSM_506_uid37659 | 22 |
| Xanthobacter_autotrophicus_Py2    | 23 |

Table 2: Genome architecture for the Rhizobiales group

| Species                                          | # of chromosomes | # of plasmids |
|--------------------------------------------------|------------------|---------------|
| Sinorhizobium_meliloti                           | 1                | 2             |
| Azospirillum_B510_uid32551                       | 1                | 6             |
| Rhodopseudomonas_palustris_BisA53                | 1                | 0             |
| Beijerinckia_indica_ATCC_9039                    | 1                | 2             |
| Azorhizobium_caulinodans_OR5_571                 | 1                | 0             |
| Oligotropha_carboxidovorans_OM5                  | 1                | 0             |
| Parvibaculum_lavamentivorans_DS-1                | 1                | 0             |
| Bartonella_henselae_Houston-1                    | 1                | 0             |
| Xanthobacter_autotrophicus_Py2                   | 1                | 1             |
| Methylocella_silvestris_BL2                      | 1                | 0             |
| Rhizobium_etli_CFN_42                            | 1                | 6             |
| Bradyrhizobium_japonicum                         | 1                | 0             |
| Ochrobactrum_anthropi_ATCC_49188                 | 2                | 4             |
| Starkeya_novella_DSM_506_uid37659                | 1                | 0             |
| Methylobacterium_chloromethanicum_CM4            | 1                | 2             |
| Nitrobacter_hamburgensis_X14                     | 1                | 3             |
| Agrobacterium_tumefaciens_C58_Cereon             | 2                | 2             |
| Brucella_suis_1330                               | 2                | 0             |
| Hyphomicrobium_denitrificans_ATCC_51888_uid33261 | 1                | 0             |
| Rhodomicrobium_vannielii_ATCC_17100_uid38253     | 1                | 0             |
| Agrobacterium_radiobacter_K84                    | 2                | 3             |
| Mesorhizobium_BNC1                               | 1                | 3             |
| Agrobacterium_vitis_S4                           | 2                | 5             |

Table 3: Gene content reconstruction

| Ancestor ID                                               | Gene on chromosomes | Genes on plasmids | total |
|-----------------------------------------------------------|---------------------|-------------------|-------|
| 11_19_21_3_1_18_2_10_6_15_9_14_8_20_16_23_4_22_12_13_7_17 | 1435                | 219               | 1654  |
| 11_19_21_3_1_18_2_10_6_15_9_14_8_20_16_23_4_22_12_13_7    | 1446                | 569               | 2015  |
| 21_3_1_18_2_10_6_15_9_14_20_16_23_4_22_12_13_7            | 1457                | 760               | 2217  |
| 14_8_20_16_23_4_22_12_13_7                                | 1272                | 988               | 2260  |
| 21_3_1_18_2_10_6_15_9                                     | 1955                | 863               | 2818  |
| 14_8_20_16_23_4_22                                        | 1287                | 1082              | 2369  |
| 21_3_1_18_2                                               | 2549                | 1627              | 4176  |
| 3_1_18_2                                                  | 2464                | 1888              | 4352  |
| 14_8_20_16                                                | 2560                | 480               | 3040  |
| 10_6_15_9                                                 | 1754                | 257               | 2011  |
| 12_13_7                                                   | 1245                | 557               | 1802  |
| 23_4_22                                                   | 2603                | 211               | 2814  |
| 6_15_9                                                    | 2146                | 98                | 2244  |
| 14_8_20                                                   | 2940                | 431               | 3371  |
| 14_8                                                      | 2479                | 390               | 2869  |
| 3_1                                                       | 3507                | 660               | 4167  |
| 18_2                                                      | 4941                | 642               | 5583  |
| 13_7                                                      | 1636                | 247               | 1883  |
| 23_4                                                      | 2271                | 263               | 2534  |
| 15_9                                                      | 3358                | 462               | 3820  |
| 11_19                                                     | 1221                | 136               | 1357  |

Table 4: The distribution of core genes in the Rhizobiales data set

|                        |       |     |
|------------------------|-------|-----|
| Sinorhizobium_meliloti |       |     |
|                        | c1    | 584 |
|                        | pSymA | 0   |
|                        | pSymB | 3   |

|                                   |         |     |
|-----------------------------------|---------|-----|
| Azospirillum_B510_uid32551        |         |     |
|                                   | c1      | 527 |
|                                   | pAB510a | 18  |
|                                   | pAB510b | 0   |
|                                   | pAB510c | 16  |
|                                   | pAB510d | 17  |
|                                   | pAB510e | 9   |
|                                   | pAB510f | 0   |
| Rhodopseudomonas_palustris_BisA53 |         |     |
|                                   | c1      | 587 |
| Beijerinckia_indica_ATCC_9039     |         |     |
|                                   | c1      | 587 |
|                                   | pBIND01 | 0   |
|                                   | pBIND02 | 0   |
| Azorhizobium_caulinodans_OR5_571  |         |     |
|                                   | c1      | 587 |
| Oligotropha_carboxidovorans_OM5   |         |     |
|                                   | c1      | 587 |
| Parvibaculum_lavamentivorans_DS-1 |         |     |
|                                   | c1      | 587 |
| Bartonella_henselae_Houston-1     |         |     |
|                                   | c1      | 587 |
| Xanthobacter_autotrophicus_Py2    |         |     |
|                                   | pXAUT01 | 0   |
|                                   | c1      | 587 |
| Methylocella_silvestris_BL2       |         |     |
|                                   | c1      | 587 |
| Rhizobium_etli_CFN_42             |         |     |
|                                   | c1      | 585 |
|                                   | p42a    | 0   |
|                                   | p42b    | 0   |
|                                   | p42c    | 0   |
|                                   | p42d    | 1   |
|                                   | p42e    | 0   |
|                                   | p42f    | 1   |
| Bradyrhizobium_japonicum          |         |     |

|                                                  |         |     |
|--------------------------------------------------|---------|-----|
|                                                  | c1      | 587 |
| Ochrobactrum_anthropi_ATCC_49188                 |         |     |
|                                                  | c1      | 549 |
|                                                  | c2      | 38  |
|                                                  | pOANT01 | 0   |
|                                                  | pOANT02 | 0   |
|                                                  | pOANT03 | 0   |
|                                                  | pOANT04 | 0   |
| Starkeya_novella_DSM_506_uid37659                |         |     |
|                                                  | c1      | 587 |
| Methylobacterium_chloromethanicum_CM4            |         |     |
|                                                  | c1      | 587 |
|                                                  | pMCHL01 | 0   |
|                                                  | pMCHL02 | 0   |
| Nitrobacter_hamburgensis_X14                     |         |     |
|                                                  | c1      | 587 |
|                                                  | p1      | 0   |
|                                                  | p2      | 0   |
|                                                  | p3      | 0   |
| Agrobacterium_tumefaciens_C58_Cereon             |         |     |
|                                                  | c1      | 523 |
|                                                  | c2      | 64  |
|                                                  | At      | 0   |
|                                                  | Ti      | 0   |
| Brucella_suis_1330                               |         |     |
|                                                  | c1      | 533 |
|                                                  | c2      | 54  |
| Hyphomicrobium_denitrificans_ATCC_51888_uid33261 |         |     |
|                                                  | c1      | 587 |
| Rhodomicrobium_vannielii_ATCC_17100_uid38253     |         |     |
|                                                  | c1      | 587 |
| Agrobacterium_radiobacter_K84                    |         |     |
|                                                  | c1      | 587 |
|                                                  | c2      | 0   |
|                                                  | pAgK84  | 0   |
|                                                  | pAtK84b | 0   |

|                        |         |     |
|------------------------|---------|-----|
|                        | pAtK84c | 0   |
| Mesorhizobium_BNC1     |         |     |
|                        | c1      | 586 |
|                        | p1      | 1   |
|                        | p2      | 0   |
|                        | p3      | 0   |
| Agrobacterium_vitis_S4 |         |     |
|                        | c1      | 580 |
|                        | c2      | 7   |
|                        | pAtS4a  | 0   |
|                        | pAtS4e  | 0   |
|                        | pAtS4c  | 0   |
|                        | pTiS4   | 0   |
|                        | pAtS4b  | 0   |

Table 5: The distribution of the core genes in all ancestral genomes and secondary chromosome assignment

| ancestor               | replicon | Number of CG |
|------------------------|----------|--------------|
| 6_15_9                 |          |              |
|                        | c1       | 524          |
|                        | c2       | 51           |
|                        | U        | 0            |
| 10_6_15_9              |          |              |
|                        | c1       | 579          |
|                        | L2       | 0            |
|                        | U        | 0            |
| 21_3_1_18_2            |          |              |
|                        | c1       | 575          |
|                        | L3       | 0            |
|                        | L5       | 0            |
|                        | L6       | 0            |
|                        | L7       | 0            |
| Continued on next page |          |              |

Table 5 – continued from previous page

| ancestor                   | replicon | Number of CG |
|----------------------------|----------|--------------|
|                            | L9       | 0            |
|                            | L10      | 0            |
|                            | L11      | 0            |
|                            | L12      | 3            |
|                            | L14      | 0            |
|                            | L16      | 0            |
|                            | L18      | 0            |
|                            | U        | 0            |
| 21_3_1_18_2_10_6_15_9      |          |              |
|                            | c1       | 574          |
|                            | L3       | 0            |
|                            | L4       | 0            |
|                            | L5       | 0            |
|                            | L7       | 0            |
|                            | L8       | 0            |
|                            | L10      | 0            |
|                            | U        | 2            |
| 14_8_20_16_23_4_22_12_13_7 |          |              |
|                            | c1       | 546          |
|                            | L5       | 0            |
|                            | L6       | 0            |
|                            | U        | 0            |
| 14_8_20_16                 |          |              |
|                            | c1       | 577          |
|                            | L3       | 0            |
|                            | L4       | 0            |
|                            | L5       | 0            |
|                            | U        | 0            |
| 13_7                       |          |              |
|                            | c1       | 577          |
|                            | U        | 0            |
| 23_4                       |          |              |
|                            | c1       | 585          |
| Continued on next page     |          |              |

**Table 5 – continued from previous page**

| <b>ancestor</b>        | <b>replicon</b> | <b>Number of CG</b> |
|------------------------|-----------------|---------------------|
|                        | L4              | 0                   |
| 15_9                   |                 |                     |
|                        | c1              | 532                 |
|                        | c2              | 55                  |
|                        | L4              | 0                   |
|                        | L5              | 0                   |
|                        | L6              | 0                   |
|                        | U               | 0                   |
| 11_19                  |                 |                     |
|                        | c1              | 420                 |
| 12_13_7                |                 |                     |
|                        | c1              | 501                 |
|                        | R2              | 0                   |
|                        | L4              | 0                   |
|                        | U               | 0                   |
| 3_1                    |                 |                     |
|                        | c1              | 580                 |
|                        | R1              | 0                   |
|                        | L6              | 1                   |
|                        | U               | 0                   |
| 3.1_18_2               |                 |                     |
|                        | c1              | 580                 |
|                        | R1              | 0                   |
|                        | R2              | 0                   |
|                        | R3              | 0                   |
|                        | R4              | 0                   |
|                        | L8              | 0                   |
|                        | L9              | 0                   |
|                        | U               | 0                   |
|                        | L7              | 0                   |
| 23_4_22                |                 |                     |
|                        | c1              | 558                 |
|                        | U               | 0                   |
| Continued on next page |                 |                     |

**Table 5 – continued from previous page**

| <b>ancestor</b>                                        | <b>replicon</b> | <b>Number of CG</b> |
|--------------------------------------------------------|-----------------|---------------------|
| 14_8_20                                                |                 |                     |
|                                                        | c1              | 560                 |
|                                                        | R2              | 0                   |
|                                                        | L3              | 0                   |
|                                                        | U               | 0                   |
| 14.8                                                   |                 |                     |
|                                                        | c1              | 584                 |
|                                                        | L2              | 0                   |
|                                                        | U               | 0                   |
| 21_3_1_18_2_10_6_15_9_14_8_20_16_23_4_22_12_13_7       |                 |                     |
|                                                        | c1              | 557                 |
|                                                        | R1              | 0                   |
|                                                        | L5              | 0                   |
|                                                        | L7              | 0                   |
|                                                        | U               | 0                   |
| 18.2                                                   |                 |                     |
|                                                        | c1              | 584                 |
|                                                        | R4              | 0                   |
|                                                        | L6              | 0                   |
|                                                        | L7              | 0                   |
|                                                        | U               | 0                   |
| 14_8_20_16_23_4_22                                     |                 |                     |
|                                                        | c1              | 542                 |
|                                                        | R1              | 0                   |
|                                                        | R2              | 4                   |
|                                                        | R3              | 1                   |
|                                                        | L5              | 0                   |
|                                                        | L6              | 0                   |
|                                                        | U               | 0                   |
| 11_19_21_3_1_18_2_10_6_15_9_14_8_20_16_23_4_22_12_13_7 |                 |                     |
|                                                        | c1              | 551                 |
|                                                        | R4              | 4                   |
|                                                        | U               | 0                   |
| Continued on next page                                 |                 |                     |

Figure 1: Genome coverage achieved by reconstructions at different gene pair cutoff.

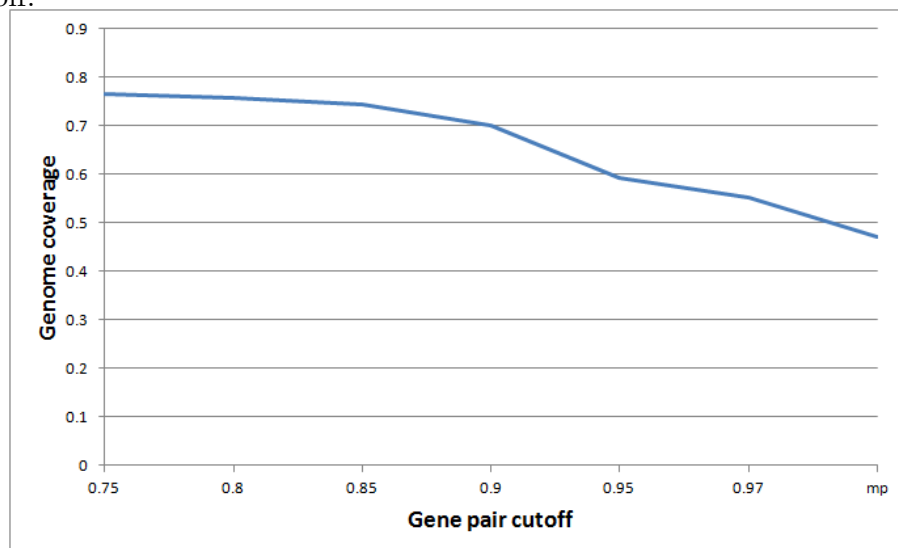

Table 5 – continued from previous page

| ancestor                                                  | replicon | Number of CG |
|-----------------------------------------------------------|----------|--------------|
| 11_19_21_3_1_18_2_10_6_15_9_14_8_20_16_23_4_22_12_13_7_17 |          |              |
|                                                           | c1       | 545          |
|                                                           | U        | 0            |

## 2 Supplemental Figures

### Genome Coverage

Genome coverage is calculated with simulated data. By comparing the reconstructed gene runs of the LCA with the true genome, we are able to calculate how much of the genome is covered by the reconstructed gene runs. The result is shown in the following figure.

Setting the gene pair occurrence cutoff to a lower value naturally results in more gene pairs which then cover more of the genome. It is worth noticing that the coverage decrease is not observed until the setting reach 0.95 and

Figure 2: Longest gene run length and correct longest gene run length in the reconstructions at different cutoff.

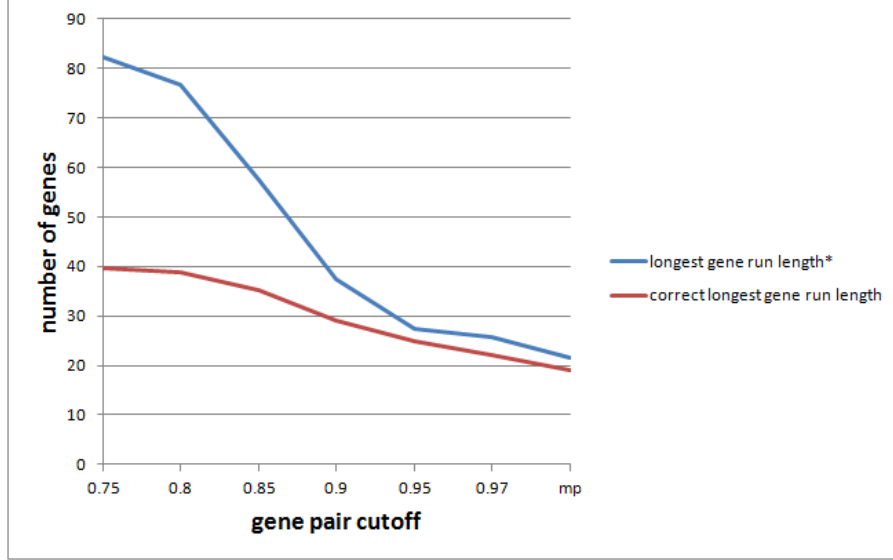

MP achieves the least genome coverage. The result is shown in Figure 1.

### Longest reconstructed gene run length

The longest gene run is of particular interest because of the information they can provide. Figure 2 show the length of the longest reconstructed gene run at different settings. The length only counts the corrected mapped part when discrepancy occurs.

### Conserved Blocks Reconstruction

One of things that attract a lot of our attention is the conserved blocks. Conserved blocks are contiguous runs of genes on the genome that carry important functions and thus more conserved than other parts of the genome. We are extremely interested to see how much of the conserved blocks can be restored by our reconstruction. Figure 3 shows the comparison of the percentages of conserved blocks that have been completely reconstructed or missed in different reconstructions.

0% means complete absent in the reconstruction. <20% means the percentage of the conserved blocks that have been reconstructed less than 20%. <40% means the percentage of the conserved blocks that have been reconstructed between 20% and 40%, and so on and so forth. 100% means the

Figure 3: Conserved blocks reconstruction status.

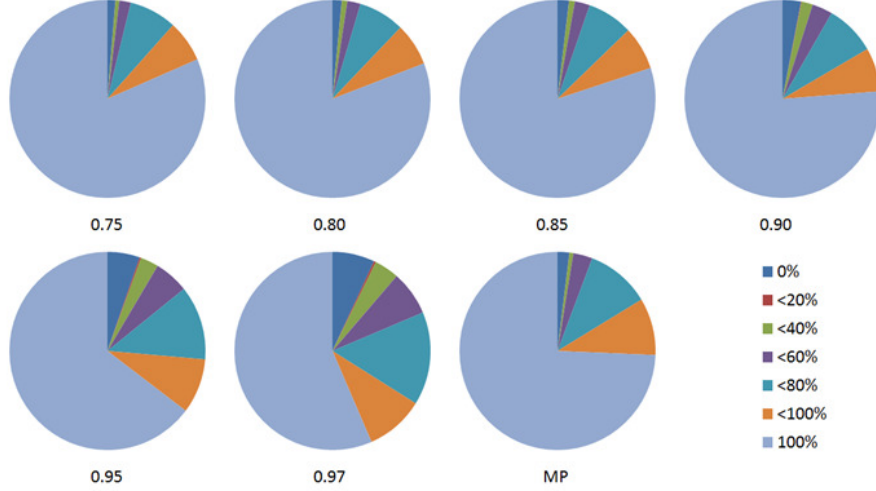

percentage of conserved blocks that have been completely reconstructed.

#### Gene Pair precision V.S. recall measure

Based on simulated data, we are able to compare map the reconstructed gene pairs for each ancestral genome to the actual genomes and calculate precision and recall, which are then plotted in Figure 4.

#### Replicon reconstruction accuracy

As the first ancestral genome reconstruction system with the ability to target at replicon-scale, the accuracy of such reconstructions is of extremely interest. With the simulated data, we are able to accurately measure the performance of the system with the following metrics. For an ancestral genome, we defined a replicon matched if there is a reconstructed replicon that shares a considerable amount of genes with it, otherwise missed. For a reconstructed ancestral genome, we defined a replicon extra if it cannot be mapped to any replicon in the corresponding ancestral genome or partial if it is mapped to an already matched replicon. To be conservative, if a reconstructed replicon shared a considerable amount of genes with more than one replicon in the actual genome, we only retain the strongest link and the only replicons are marked missed. The four measures are plotted in the following figure. Gene pair cutoff and gene cutoff were set to 0.9 with the consideration of all the information retrieved from simulation tests above.

Figure 4: Precision and recall for different reconstructions.

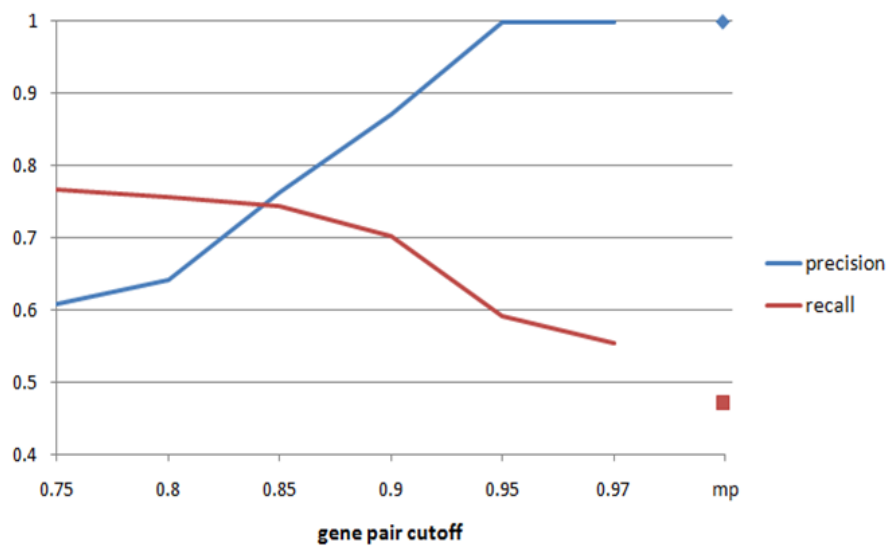

Figure 5: Replicon reconstruction accuracy.

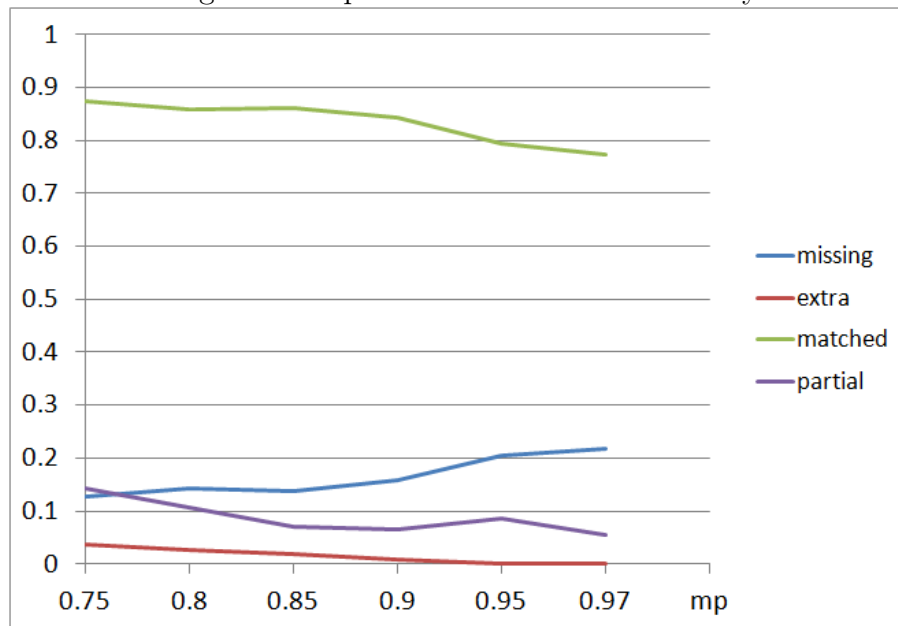

Supplement: Supplementary File 1 — PDF-Document (PDF, 185 KB) [file genes-03-00423-s001.pdf]
